# The spread of resistance to imidacloprid is restricted by thermotolerance in natural populations of *Drosophila melanogaster*

Alexandre Fournier-Level<sup>1</sup>, Robert T Good<sup>1</sup>, Stephen Wilcox<sup>2</sup>, Rahul V Rane<sup>3</sup>, Michelle Schiffer<sup>1</sup>, Wei Chen<sup>1</sup>, Paul Battlay<sup>1</sup>, Trent Perry<sup>1</sup>, Philip Batterham<sup>1</sup>, Ary A Hoffmann<sup>1</sup> and Charles Robin<sup>1</sup>

<sup>1</sup>: School of Biosciences, The University of Melbourne, Parkville, Australia; <sup>2</sup>: Walter and Eliza Hall Institute, Parkville, Australia; <sup>3</sup>: CSIRO, Canberra, Australia

Corresponding authors: Alexandre Fournier-Level ([afournier@unimelb.edu.au](mailto:afournier@unimelb.edu.au)) and Charles Robin ([crobin@unimelb.edu.au](mailto:crobin@unimelb.edu.au))

## Abstract

Imidacloprid, the world's most utilised insecticide<sup>1</sup>, has raised considerable controversy due to its harmful effects on non-pest species<sup>2-6</sup> and there is increasing evidence showing that insecticides have become the primary selective force in many insect species<sup>7-14</sup>. The genetic response to insecticides is heterogeneous across population and environment<sup>15-17</sup>, leading to more complex patterns of genetic variation than previously thought. This motivated the investigation of imidacloprid resistance at different temperatures in natural populations of *Drosophila melanogaster* originating from four climate extremes replicated across two continents. Population and quantitative genomic analysis, supported by functional tests, demonstrated a polygenic basis to resistance and a major trade-off with thermotolerance. Reduced genetic differentiation at resistance-associated loci indicate enhanced gene flow at these loci. Resistance alleles showed stronger evidence of positive selection in temperate populations compared to tropical populations. Polygenic architecture and ecological factors should be considered when developing sustainable management strategies for both pest and beneficial insects.

## 26 **Introduction**

27 Many organisms recurrently exposed to pesticides develop resistance, causing major issues for the  
28 sustainable control of pests and pathogens. Resistance emerges through many, if not any, mechanism  
that stop or limit the toxic compound, or toxic derivatives, from reaching its molecular target. However,  
30 understanding the extent to which ecological and evolutionary context shapes the adaptive response to  
insecticides remains challenging. While resistance emerging through mutations of major effect has  
32 been extensively described<sup>18-20</sup>, resistance that has a multifactorial basis has often been overlooked.  
Recent large-scale genomic projects underscore findings that the amplification of gene families often  
34 contributes to insecticide resistance<sup>21-23</sup> and that, alongside new mutations, standing polygenic variation  
and ecological factors play an important role globally<sup>24,25</sup>. A quantitative basis to resistance is a  
36 theoretical requirement to support the many cases of recessive resistance, and also helps explain why  
resistance to new pesticides is occurring increasingly faster since the introduction of modern chemical  
38 controls (penicillin, DDT and 2,4-D for microbes, insects and weeds, respectively)<sup>26-29</sup>.

Under steady selection, alleles conferring resistance are expected to go to fixation and selective sweeps  
40 have indeed been widely observed for loci underlying resistance, one of the best examples being the  
*Cyp6g1* locus conferring resistance to DDT and many other chemicals in *Drosophila melanogaster*<sup>8,18</sup>.  
42 This locus has experienced a sequence of selective sweeps which increased the frequency of resistant  
alleles<sup>30,31</sup>. However, the ancestral susceptible allele was still evident in recent samples of natural  
44 genetic diversity, showing that highly favoured resistance alleles might not always fixate<sup>32</sup>. The  
persistence of such polymorphism suggests evolutionary trade-offs between resistance and other  
46 ecological factors<sup>16,33</sup> which are poorly understood particularly for multifactorial resistance.

Resistance mutations often occur in genes that exert a primary, ancestral function (e.g the nervous  
48 system for insect or the photosystems for plants) while resistance is a secondary, derived function.  
Selective forces may act differently on resistance genes recruited from different pathways and induce a  
50 fitness cost for bearing the resistance allele and trade-offs may vary among populations depending on

52 local adaptive pressures<sup>34–36</sup>. However, evidence of fitness costs associated with resistance are not that  
54 commonly reported in natural pest populations<sup>37–40</sup>. This could be due at least in part to a complex eco-  
56 evolutionary context that is difficult to reproduce in the laboratory and experimental measurements of  
58 fitness may not reflect those that are relevant in field conditions<sup>41</sup>. A way forward is to combine  
experiments that apply specific types of environmental variation with the use of population  
backgrounds that are specifically adapted to particular environmental conditions. The detection of  
trade-offs can then be facilitated by harnessing whole-genome sequencing approaches and a well  
characterised set of responses to experimental perturbations.

At the species range scale, populations evolve across multiple environments under different selection  
60 pressures<sup>16</sup>. This is particularly the case for widespread species including pests and disease vectors<sup>42,43</sup>.  
*D. melanogaster* is a cosmopolitan and synanthropic species that has a broad range and bears abundant  
62 diversity within natural populations<sup>44</sup>, ideal for testing complex evolutionary questions. Wild  
populations vary in their responses to temperature<sup>45</sup> and insecticide<sup>30</sup> with potential parallels across  
64 continents<sup>46</sup> so it is now timely to investigate interactions between multiple genetic and environmental  
factors with population genomic resolution.

66 Here we explore how multiple field populations of *D. melanogaster* which have undergone long-term  
selection in different climates have dealt with the novel and ubiquitous short-term selection pressures  
68 associated with pesticides. Using a parallel sampling across the climate extremes of two continents, we  
build on the unmatched resources existing in *D. melanogaster* to comprehensively analyse the effect of  
70 Single Nucleotide Polymorphisms (SNPs), Insertion and Deletions (InDels), Transposable Elements  
(TEs), Copy-Number Variants (CNVs) and symbiotic micro-organisms on the genetic architectures of  
72 temperature and insecticide resistance. This provides a test of whether genetic differentiation observed  
for resistance genes interacts with thermotolerance at the phenotype and molecular level.

## 74 **Results**

76 *Longevity in response to combined insecticide and temperature stress*

78 In regions of extreme temperature and precipitation (Fig. 1A-B), 16 natural populations of *Drosophila*  
80 *melanogaster* were sampled outdoors in autumn with two collections per climate zone and per  
continent (Table S1). Individual flies (n=12,770) from 400 isofemale lines (i.e. the progeny of a single,  
82 mated field-collected female fly) were tested for longevity within 25 generations from collection, and  
were either exposed or not exposed to 1000ppm of imidacloprid diluted in sucrose media, at either  
84 20°C or 30°C. Imidacloprid exposure reduced longevity by 83.9 hours (SE=4.9) producing a non-acute  
response while increasing the temperature from 20°C to 30°C reduced longevity by 118.1 hours  
(SE=4.1). The flies originating from hot climates had longer lifespan in the heat (ANOVA, n=7801,  
86  $F_{1,7799}=10.17$ , P=0.00143, Fig1C) consistent with anticipated climate adaptation, but had shorter  
lifespan when exposed to imidacloprid (ANOVA, n=10612,  $F_{1,10610}=11.13$ , P=0.000854, Fig1C). The  
climate zone of origin as well as the continent of origin had a significant effect on longevity, however  
88 the models including population and isofemale line effects explained a greater proportion of variance  
(Table S2). 58% of the variance in time-to-death was explained by isofemale genotype effect and 32%  
90 by population effect, suggesting that genetic variation for longevity segregates more within population  
than among them. The responses to elevated temperature and imidacloprid computed from the effects  
92 of linear model with the best fit to the data were strongly negatively correlated, both at the population  
( $\rho=-0.91$ , Fig. 1D) and at the isofemale genotype level ( $\rho=-0.68$ , Fig. 1E), revealing a trade-off between  
94 insecticide and elevated temperature tolerance within and among populations. The Australian  
populations were more resistant to imidacloprid than the American (Fig. 1D) with the exception of the  
96 population from Victoria (Australia).

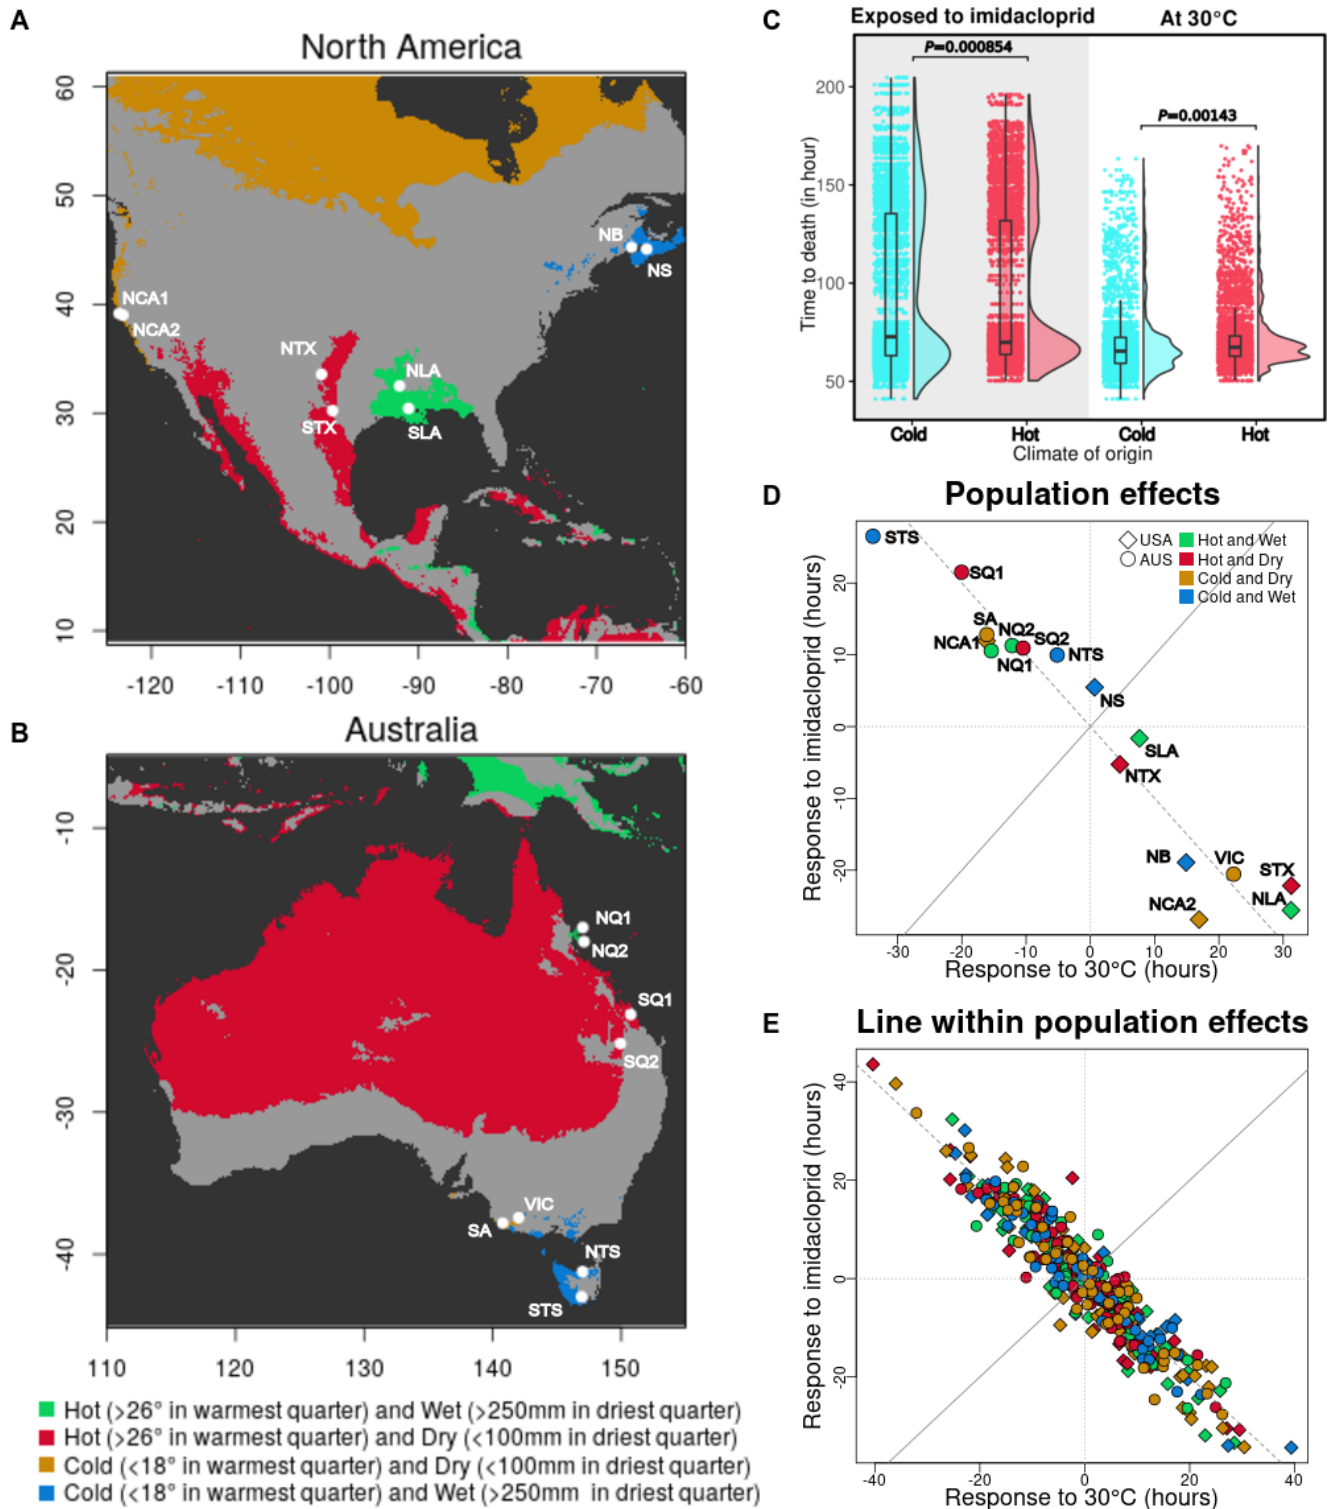

**Figure 1: A-B) Origin of the populations sampled and location of extreme climates in North America and Australia. C) Difference in the longevity of individual flies exposed to 1000ppm imidacloprid or to 30°C depending on their climate of origin. D-E) Mixed-linear model effects of population or isofemale line within population variation on longevity under elevated temperature (30°C) and insecticide stress (1000ppm imidacloprid). Population labels are: NB: New Brunswick, NCA1: North California 1, NCA2: North California 2, NLA: North Louisiana, NQ1: North Queensland 1, NQ2: North Queensland 2, NS: Nova Scotia, NTS: North Tasmania, NTX: North Texas, SA: South Australia, SLA: South Louisiana, SQ1: South Queensland 1, SQ2: South Queensland 2, STS: South Tasmania, STX: South Texas, VIC: Victoria.**

98 *Molecular variation associated with climate and resistance to imidacloprid*

For each population at each temperature, every fly exposed to imidacloprid was assigned into one of  
100 five pools of resistance that covered the complete phenotypic distribution; each pool of genomic DNA  
was sequenced. The sequence reads were mapped to the *Drosophila melanogaster* “hologenome”,  
102 which includes the reference genome, and those of six of its most common microbes<sup>47</sup> to call SNPs, TE  
insertions and CNV. SNP-based polymorphism and genetic diversity were consistent across populations  
104 (average  $\pi=0.0058$  and  $\theta_{Watterson}=0.0059$  for the autosomes, Table S2) with the exception of the North  
California 1 population that showed about two-fold more diversity ( $\pi=0.0116$  and  $\theta_{Watterson}=0.0134$ ).  
106 Genome-wide average estimates of  $\pi$  and  $\theta_{Watterson}$  were not different (paired t-test,  $n=16$ ,  $t=-1.746$ ,  
 $P=0.101$ ), suggesting populations were sampled at a demographic equilibrium without recent intense  
108 selective or founding events. Neither the temperature nor the precipitation at the location of origin was  
correlated with the level of polymorphism (GLM,  $n=16$ ,  $P>0.15$ ).

Using SNP alleles tagging cosmopolitan chromosomal inversions<sup>48</sup>, the *In(3R)Payne* inversion was  
found to be more prevalent in Australia and showed clinal variation from high frequency in North  
112 Queensland to low frequency in South Tasmania, consistent with previous findings<sup>49</sup> (Table S3). The  
*In(2L)t* and *In(3R)Payne* inversions were more frequent in hot climates (three-way ANOVA testing  
continent, temperature and precipitation regime of origin,  $n=16$ , *In(2L)t*:  $F_{1,11}=22.1$ ,  $P=6.53 \times 10^{-4}$  and  
114 *In(2L)Payne*:  $F_{1,11}=22.0$ ,  $P=6.63 \times 10^{-4}$ ) and *In(3R)Mo* in wet climates ( $F_{1,11}=4.973$ ,  $P=0.0202$ ). The only  
116 common microbe differentially present across populations was *Acetobacter pomorum* which was more  
frequent in North America (Table S4,  $F_{1,11}=6.730$ ,  $P=0.0249$ ) and in cold climates in general  
118 ( $F_{1,11}=5.643$ ,  $P=0.0368$ ). Interestingly, the presence of pathogenic bacteria *Pseudomonas entomophila*  
and *Gluconobacter morbifer* correlated with the increased lifespan of flies exposed to imidacloprid  
120 from North Tasmania and in North California 1 and South Australia (GLM, 5 pools,  $P=0.008$ ,  $P=0.001$   
and  $P=0.006$ , respectively), always at 30°C. We also detected a positive effect of *Wolbachia pipientis*

on longevity at 30°C in North Louisiana and North Texas (GLM, 5 pools,  $P=0.005$ ,  $P=0.007$ ).

Genome-Wide Association (GWA) between the SNPs and TEs and imidacloprid resistance revealed the influence of two major loci (Fig. 2A-B). These two loci were identified in 22 and 21 out of the 32 GWA tests (16 populations tested for two temperatures, Fig. S2), and were located within the coding sequence of the *Paramyosin* (*Prm*) gene and within the coding sequence plus 60kbp upstream of the *Nicotinic-Acetylcholine Receptor Alpha 3* (*nACHR $\alpha$ 3*) gene, the latter encoding a subunit of the nicotinic-acetylcholine receptor, imidacloprid's molecular target<sup>50</sup>. CRISPR deletion alleles of *nACHR $\alpha$ 3* increased imidacloprid susceptibility while heterozygous MiMIC<sup>51</sup> disruption for *Prm* increased susceptibility only at 20°C (Fig 3).

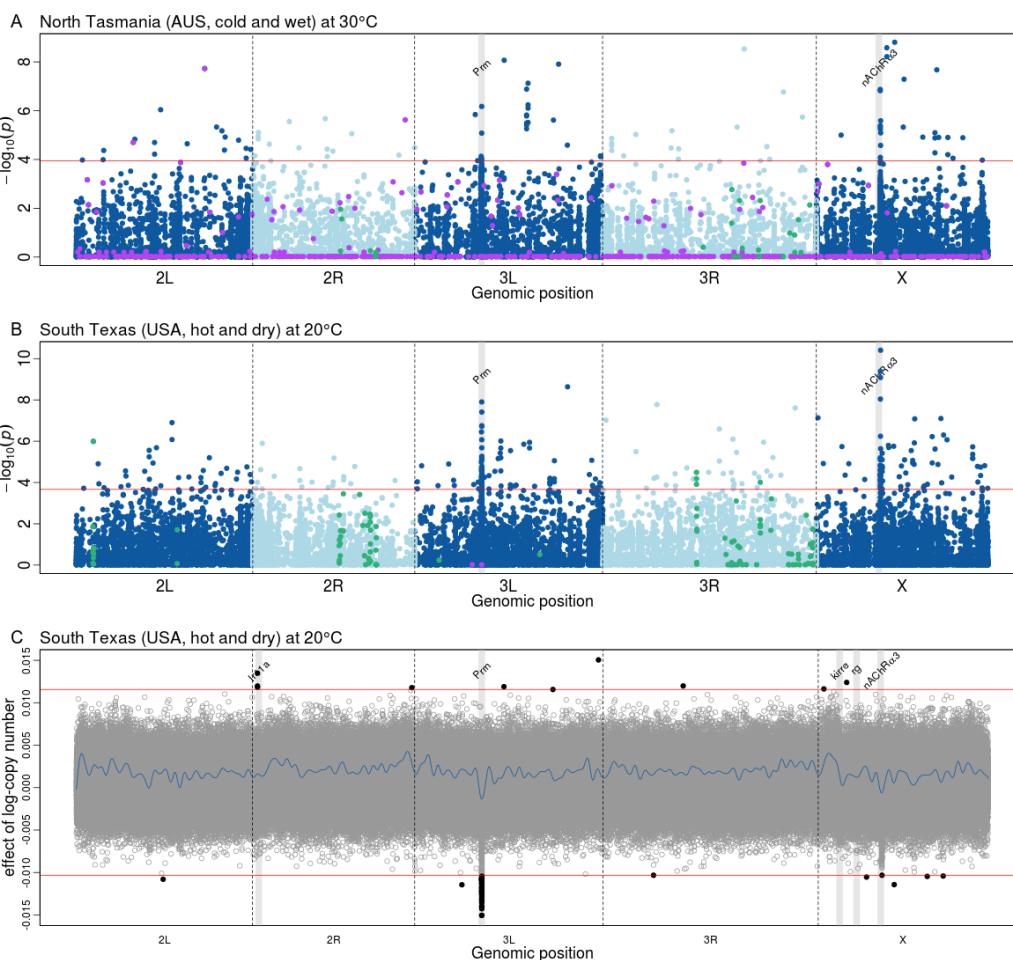

**Figure 2: A-B) Manhattan plots indicating the genomic position of polymorphisms associated with imidacloprid resistance.** Blue dots are SNP and small InDels, green dots are Inversion-tagging SNPs, purple dots are transposable elements and the red line indicates the FDR=5% threshold. Vertical shades of grey indicate the position of the two main candidate genes, *Paramyosin* and *N-Acetylcholine receptor  $\alpha$  3* located in position 3L:8,733,456-8,745,162 and X:8,277,227-8,438,674 of the *D. melanogaster* genome v6. **C) Effect of CNV on imidacloprid resistance by windows of 266bp.** Positive values indicate a greater number of copies increasing resistance. Grey and black dots are non-significant and significant CNV, respectively; the blue line represent a smoothed spline curve joining

the individual dots (smoothing parameter  $\lambda=0.03$ ); the red lines indicate the FDR=5% threshold. Vertical shades of grey indicate the position of the five main candidate genes: *Ionotropic receptor 41a*, *Paramyosin*, *Kin of Irre*, *Rugose* and *N-Acetylcholine receptor alpha 3*.



164 16 of the 26 TEs associated with imidacloprid resistance belonged to the R1A1-element family  
(analysis restricted to the Australian populations which have higher sequencing coverage overall). All  
166 but one R1A1-element located in position 2R:19,900,676-19,901,175 (*D. melanogaster* v6 assembly)  
in the North Tasmania population were rare with a frequency lower than 0.06, suggesting that in our  
168 data, TEs did not heavily contribute to the variation detected for insecticide resistance (Fig. S1). 62  
inversion-tagging SNPs out of 473 were significantly associated with imidacloprid phenotypes in five  
170 American and seven Australian populations (Fig. S2) with 41 out of these 62 SNPs decreasing  
resistance to imidacloprid. 34% of all SNP tagging *In(2L)t* and 72% of all SNPs tagging *In(3R)Payne*  
172 showed a significant association in at least one GWA test which is higher than expected by chance.  
GWA tests between CNVs and imidacloprid resistance in the Texas populations further supported the  
174 presence of major effects at the two major loci detected through SNP-based GWA with fewer copies  
corresponding to increased imidacloprid resistance which is the opposite of knock-out mutation effects  
176 (Fig. 2C). However, the three CNVs most commonly influencing resistance across populations (in at  
least 10 out of 32 GWA tests, Fig. S3) all corresponded to higher copy-number increasing longevity.  
178 These CNVs located in position 2R:4,917,519-5,021,955, X:2,740,384-3,134,532 and X:5,085,759-  
5,254,864 colocalised with the *Ir41a*, the *kirre* and the *rg* genes, respectively.



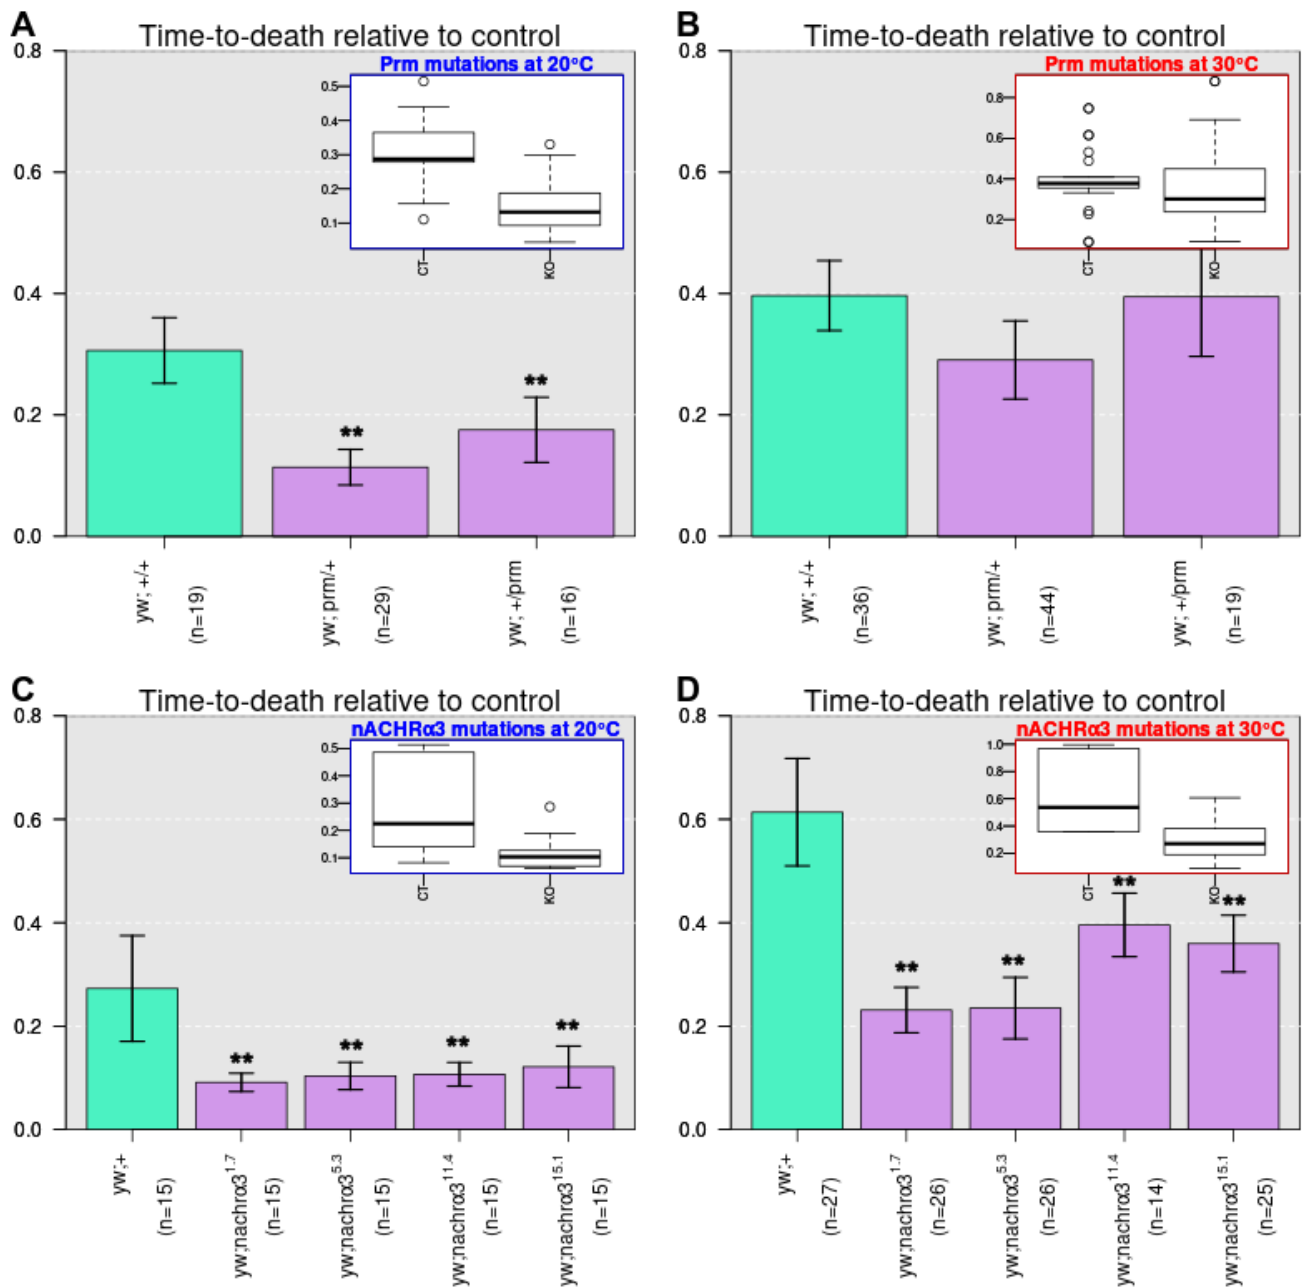

**Figure 3: A-D) Mean longevity +/- standard error of flies exposed to imidacloprid relative to control (y-axis) for wild type and mutants in candidate genes.** The top-right box in each panel is a scatter-boxplot recapitulating the difference in genetic effect between mutant and wildtype for each gene and temperature comparison in the same unit of relative longevity with respect to control; the thick shows the mean effect, the box shows the interquartile distribution and the whiskers, the 5%- and 95%-tile distribution. Test for *Prm* are shown in panel A and B, *nAChRα3* in panel C and D tested at 20°C (panel A and C) or 30°C (panel B and D). \*\*: P-value<0.01 (t-test).

184  
186  
188  
190

192 *Patterns of population differentiation and selection among populations*

The genetic differentiation ( $F_{st}$ ) between populations was correlated with geographic distance, consistent with isolation by distance ( $r_{Mantel}=0.23$ ,  $P<0.001$ ) with no influence of latitude (distance from the equator,  $r_{Mantel}=0.03$ ,  $P=0.442$ ). Overall less than half of the genetic differentiation was explained by climate distance ( $r_{partial\ Mantel}=0.11$ ,  $P=0.018$ ). However, two regions at the top of chromosome 2L and bottom of chromosome 3R collocating with the *In(2L)t*, *In(3R)Mo* and *In(3R)Payne* inversions showed high genetic differentiation driven by climate consistent with previous findings<sup>47,49,52</sup>(Fig. 4A-B). Conversely, the genomic regions where candidate genes are located show little evidence of climate differentiation. We found that the average  $F_{st}$  value for genomic intervals containing resistance candidates identified across multiple GWA tests, was lower than expected (Monte Carlo simulation,  $P<0.006$ , Fig. 4D), highlighting minimal genetic differentiation for resistance candidate genes and supporting the hypothesis of an increased gene flow for these loci.

204 The evolutionary state of each allele, either ancestral or derived, was inferred by remapping the genome of the four most closely related species of *Drosophila* for which complete genomic sequences are available (*D. simulans*, *D. yakuba*, *D. erecta* and *D. sechellia*). For 23 out of 32 GWA tests, the resistance alleles predominantly corresponded to derived allele states while susceptible alleles were ancestral ( $\chi^2$ , maximum  $P<0.026$  for these 23 GWAS). Three out of four tropical populations did not follow this pattern (both Louisiana and North Queensland 1 populations), with derived alleles conferring insecticide susceptibility at all temperatures (showed in the green box in Fig. 4C). This was also true for the South Texas, the North California 1 and the Victoria populations but only for the temperature furthest from their expected climatic preference (20°C, 30°C and 30°C, respectively). Using global freshwater pesticide data<sup>53</sup>, we did not find an effect of the level of pesticide pollution at the location of origin on insecticide resistance or the excess of derived allele conferring susceptibility. However, the excess of derived alleles conferring susceptibility positively affected the trade-off by increasing longevity at 30°C over longevity exposed to imidacloprid (GLM,  $P<0.0005$ ).

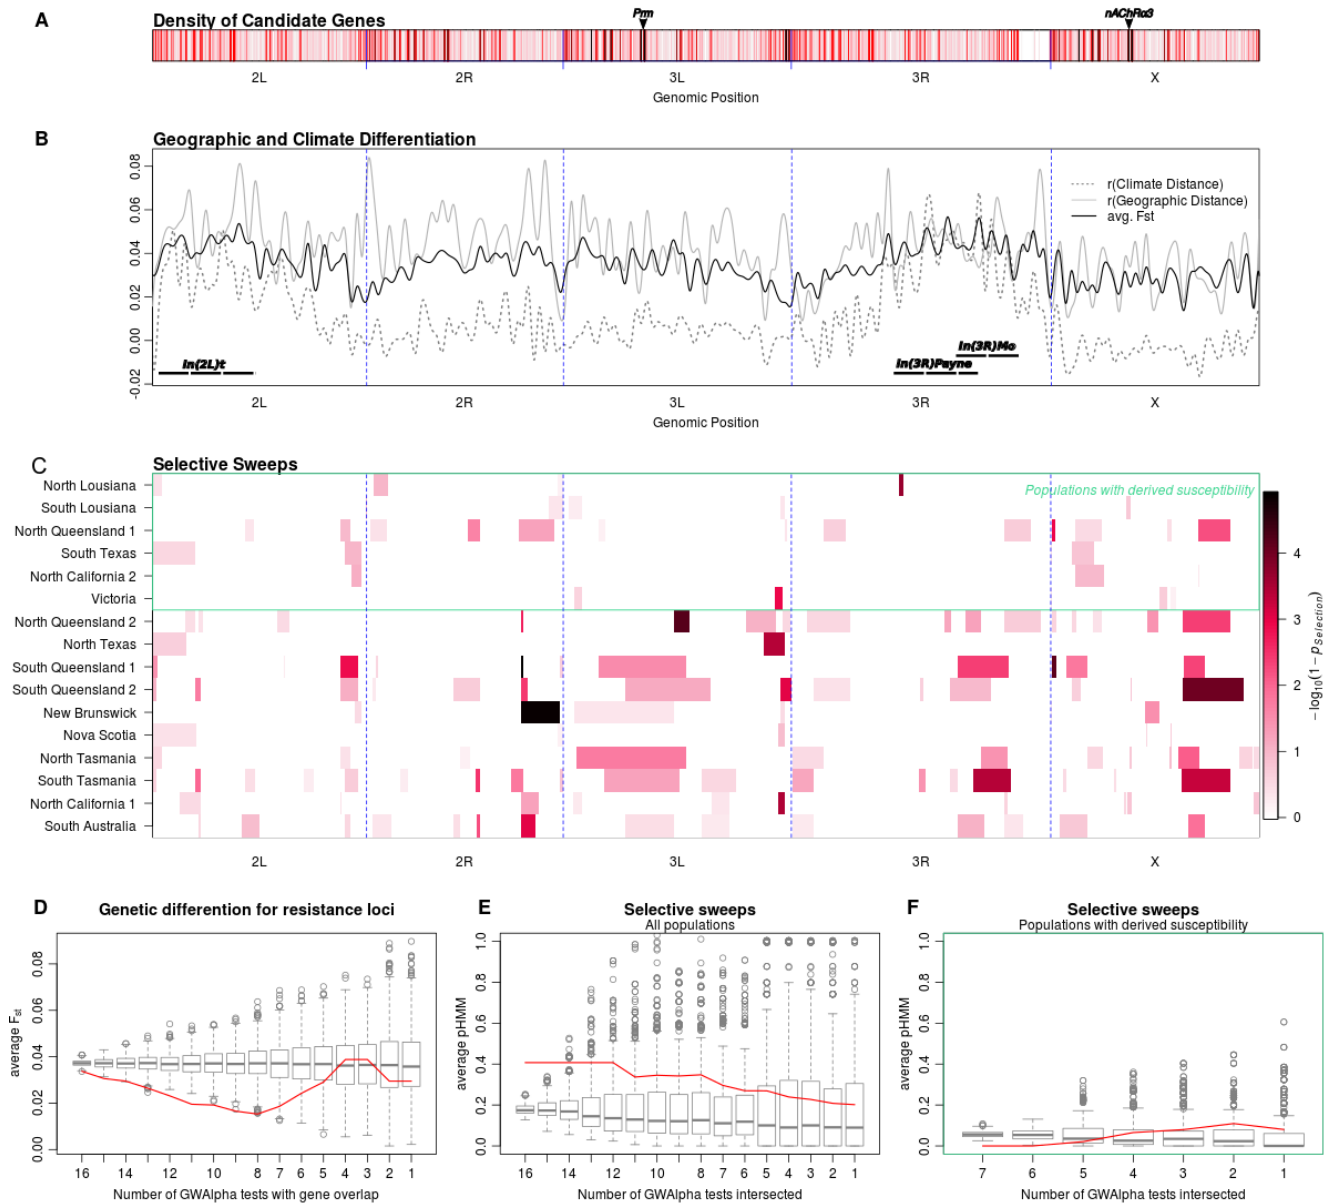

**Figure 4: A) Density of candidate genes along the genome.** Darker colours indicate higher density of candidate genes; The position of the two main candidate gene *Prm* and *nAChRa3* is shown with an arrow **B) Average  $F_{st}$  and partial Mantel  $r$  statistic for correlations between  $F_{st}$  and geographic/climate distance over the genome** (sliding window of 5Kbp with smoothing parameter  $\lambda=0.05$ ). The position of the three inversion associated with decayed resistance and increased climate adaptation *In(2L)t*, *In(3R)Mo* and *In(3R)Payne* is reported with long dashes. **C) Position of selective sweeps.** Selective sweeps were inferred based on the log-probability of transitioning from a neutral to a selected state (pHMM) inferred from a Hidden Markov Model based on site-frequency spectrum for each chromosome and each population. **D-F) Monte Carlo simulations testing the distribution of  $F_{st}$  among candidate genes (solid red line) compared to null genome-wide expectation (box for interquartile and whiskers for inter-5%-ile distribution), the distribution of probabilities of selection in a Hidden Markov Model (pHMM) across all populations and the distribution of pHMM in populations with derived susceptibility.** The x-axis corresponds to the minimum number of GWA tests a given candidate gene was identified in (from the gene set found significantly associated in 16 or more GWA tests to the gene set found significantly associated in a one or more GWA test).

234 Selective sweep analysis performed using Hidden Markov models of the allele frequency  
spectrum<sup>54</sup> (Fig. 4C) strongly identified two regions in position 2R:20,779,995-20,989,995 and  
X:16,013,467-16,633,467 (top 1%-tile of selection probabilities averaged across populations) and a  
236 region in position 3L:23,339,400-23,849,400 (top 5%-tile) but did not include *Prm* or *nAChR $\alpha$ 3*. *Para*,  
encoding the molecular target of organochloride and pyrethroid insecticides<sup>19</sup>, but never associated with  
238 resistance in natural populations of *D. melanogaster*, was located in the regions of chromosome X  
showing evidence of positive selection (top 1%-tile of selection probabilities). Selection probabilities  
240 among candidate genes identified in more than 13 out of 32 GWA tests were higher than expected  
(Monte Carlo simulation,  $P < 0.005$ , Fig. 4E). The populations in which resistance alleles corresponded  
242 to ancestral states showed overall less evidence of positive selection compared to other populations (t-  
test,  $P = 1.7 \times 10^{-9}$ ). This pattern was accentuated for insecticide resistance loci: in the populations where  
244 the derived alleles increased susceptibility, among which three are tropical (green box in Fig4C), there  
was a lower than expected probability of selection (Monte Carlo simulation,  $P < 0.001$ , Fig. 4F).

## 246 Discussion

### 248 Multifactorial bases to resistance

Resistance to imidacloprid in natural populations of *D. melanogaster* was shown to be controlled by a  
250 mixed genetic architecture involving major genes segregating across multiple populations and a  
polygenic background that exhibits a trade-off with thermotolerance. Of the two major genes we  
252 consistently identified, *nAChR $\alpha$ 3* is functionally well characterised. It encodes one of the seven  $\alpha$   
subunit of the N-acetylcholine receptor which is the known target of imidacloprid<sup>55</sup>. *Prm* has been less  
254 extensively studied. In insects, it is known to encode important structural constituents of striated,  
obliquely striated and smooth muscles core thick filaments<sup>56</sup>. In *D. melanogaster*, *Prm* disruption was  
256 shown to affect indirect flight muscle stiffness and power generation<sup>57</sup>. Two studies have shown up-  
regulation of *Prm* in the context of insecticide resistance; in *Tribolium castaneum* exposed to

258 insecticidal growth regulator diflubenzuron<sup>58</sup> and in permethrin-resistant *Aedes aegyptii* after Zika virus  
infection<sup>59</sup>, respectively. The involvement of *Prm* could be a neuro-muscular compensation of a post-  
260 synaptic dysfunction as observed in human<sup>60,61</sup>, and in this case, it could act after the binding of  
imidacloprid or perhaps ameliorate the *nACHRα3* mutation. The two major candidate genes from our  
262 study primarily point to target-site modes of resistance and this mechanism is underscored by  
significant enrichment of nervous system genes in the GWA analysis (Fig. S4, coupled with functional  
264 evidence for *ank* and *Pde9*, Fig. S5). Conversely, we only identified two genes belonging to the  
canonical detoxification genes family, and neither of these (*Cyp311a1* and *Cyp4s3*) are strong  
266 candidates for having roles in insecticide metabolism. The P450 *Cyp6g1*, that has previously been  
associated with imidacloprid metabolism<sup>62-64</sup>, was not detected in our analysis and inspection of a SNP  
268 tagging the CNV believed to be causal for the resistance (2R:12185332), is fixed in almost all  
Australian populations (the exception being a South Australian population) and was at high frequency  
270 in the north American populations we sampled (0.71 to 0.97). The analysis of microbial “hologenomes”  
adds another likely contributor to the multifactorial basis to variation in insecticide mortality. The  
272 microbes associated with resistance were all pathogenic, contrary to the climate- or continent-  
associated ones. This line of evidence leans toward a priming effect of immune defence  
274 mechanisms<sup>65</sup> as opposed to the more common hypothesis of enhanced holometabolisation of toxic  
compounds being mediated through microorganisms<sup>63,66-68</sup>.

### 276 *Intra-genomic conflict could slow the evolution of resistance*

278 We have probed multiple sources of molecular variation and showed that different classes of genomic  
change contribute to survivorship on insecticides and that they differ between temperatures. In  
280 particular, copy-number variation can be a major mechanism for resistance evolution<sup>23,30</sup> and in this  
study, CNVs collocated with the two major resistance loci. While no significant pattern emerged  
282 through the analysis of transposable elements, cosmopolitan genomic inversions showed more

consistent effects. *Payne* and *Mo*, the inversions associated with increasing susceptibility in our study, are likely to preserve gene complexes involved in climate adaptation<sup>47,49</sup>. These recombination-limiting genomic structures may also slow the pace of evolution, particularly when a novel selection pressure such as an insecticide interacts with a long-term one such as environmental stress. The fixation of a resistance allele can thus be considerably slowed down by the genomic context and result in the persistence of polymorphism irrespective of directional selection on the resistance allele. Nonetheless, this study also suggests that the genetic response to imidacloprid is conditional to the environment to which insects are pre-adapted. Insecticide resistance is thus fundamentally a complex trait likely to be both affected by genotype-by-environment interactions and by selection acting on a specific locus with different evolutionary potential. Due to a focus on variation segregating within populations, resistance mutations that have already reached fixation or that are near fixation (such as *Cyp6g1* alleles in Australian populations) do not arise in our genome wide association studies. However, a high fraction of resistance loci showed intermediate frequency with low levels of population differentiation relative to other variants at similar frequency across the genome. This suggests that gene flow is higher in these regions and that could be explained by selection favouring the spread of such variants. This is supported by the finding that imidacloprid resistance loci, notably those in temperate populations show signals of selection in their allele frequency spectrum. Given recessivity is typical, the increase in frequency of such polymorphisms foreshadow resistance outbreaks and motivates the identification of similar polymorphisms in pest species.

### ***The use of the eco-evolutionary context for managing resistance***

Species that develop resistance to pesticides are typically widespread and they often are found to exhibit local adaptations that initially appear distinct from adaptations to control chemicals<sup>69</sup>. However here we have shown that the ecological genomic approach we have taken can identify important trade-offs between contrasting selective pressures. The peri-domestic ecology of the model insect

308 *Drosophila melanogaster* was used as an environmental sentinel and the wealth of molecular resources  
available to understand its biology provides a powerful platform for testing multiple hypotheses. While  
310 it is well established that the same major insecticide resistance variants may arise independently in  
distantly related species (e.g. the same knockdown resistant amino acid mutations have occurred in  
312 many insect species<sup>24</sup>), it is less likely that genes contributing to the polygenic component will be  
common between species. However, the polygenes of different species are more likely to share  
314 molecular functions or act in common molecular pathways. Furthermore, the finding that the genomic  
architecture of insecticide resistance can point to evolutionary limits should encourage a systematic  
316 targeting of genomic regions where differentiation is high and/or where recombination is limited in pest  
and vector insects (many pest insects do indeed harbour chromosomal inversions). Here we identified  
318 such genomic regions by combining three experimental factors in the design of the study: rational  
sampling across climate extremes, traits being tested under multiple conditions and whole-genome  
320 sequencing. The population sampling ensured the ecological context of pre-adaptation to distinct  
temperature regimes was retained to its best extent and the tests at different temperatures led to  
322 physiological responses that increased the chance of identifying trade-offs. The pool-sequencing  
approach enabled efficient analysis of whole-genome data. The array of methods used in this study are  
324 readily transferable to most species inhabiting diverse environments, regardless of whether they are  
pests, disease vectors or beneficial species affected by pesticides.

### 326 **Conclusion**

328 Knowledge of an insecticide-to-insect molecular interface alone, in the absence of a relevant  
environmental and genomic context, will likely not be enough to understand and predict resistance  
330 outbreaks, and will not provide an appreciation of the interplay of environment variation, genetic  
constraints and evolutionary outcomes. Ecological barriers seem capable of limiting the spread of  
332 functional genetic diversity, and such barriers need to be more systematically investigated across



multiple populations and environments. Imidacloprid has been widely used in the last decades and has received considerable attention for its effect on beneficial insects in recent years. The response to imidacloprid in *D. melanogaster* is thus generally relevant even though the reductionist nature of the experiments would have overlooked other factors such as resistance to multiple other insecticides and climate variables which could add to the already complex situation described in our study. However, the evolutionary response it promotes is likely to be very similar to that of other classes of pesticide and the genomic mechanism of the response are also likely to be similar in other insects (inversion or CNV). Understanding resistance evolution across tiers of biological organisation including populations across the entire species range, genotypes within populations and explicit genomic context is thus becoming the new challenge. With such information, there is an opportunity to develop an improved understanding of the evolutionary trajectory of insecticide resistance in target pests and non-target species.

## Methods

### *Fly collections, maintenance and bioassay*

Natural fly populations were collected outdoors in October 2013 in North America and in March/April 2014 in Australia, corresponding to early Autumn for each continent (Fig. 1A-b and Table S1). 25 isofemale lines were established from each population and reared in the lab under constant light and temperature (25°C) conditions on Bloomington cornmeal media. Flies were kept for less than 25 generations in the lab before performing the experiments.

For each population, five 4 to 7 day old individual female flies from each isofemale line were individually exposed to an 1000ppm imidacloprid (Confidor®; Bayer Crop Science) diluted in 500mL of a 2% agarose/5% sucrose + 50mg/L tegosept media. Controls were exposed to the same mixture lacking imidacloprid. This design was tested at two different temperatures (20°C and 30°C) and replicated three times with flies from different generations to avoid batch effects. For each replicate, the

358 time-to-death of 125 individual flies (5 flies per isofemale line) was recorded every 12 to 18 hours. For  
each replicate of each population the dead flies were immediately frozen and distributed into five pools  
360 (6.25%-, 24.5%-, 74.5%- and 94.75%-tile) based on their level of resistance as measured by time of  
death. This equates to 375 flies being distributed across 5 pools for each library synthesis (24, 72, 123,  
362 72 and 24 flies respectively).

### 364 *Sample preparation and sequencing*

Total genomic DNA was extracted using phenol/chloroform/isoamyl alcohol. Total DNA was  
366 quantified and 10ng was used to synthesise sequencing libraries using Illumina TrueSeq nano  
(Illumina, San Diego, USA) and barcode adapters kits (Agilent, Santa Clara, USA). Library quality and  
368 DNA concentration was measured on an Agilent 2200 TapeStation using D1000 DNA tapes (Agilent,  
Santa Clara, USA). The 160 libraries (16 populations x 2 temperatures x 5 times-to-death)  
370 corresponding to either the Australian or American samples were pooled and run on 7 lanes of the  
Illumina NextSeq 500 sequencer (Illumina, San Diego, USA) in 75bp paired-end reads mode.

372

### *Genomic analysis*

374 Paired-end sequences in FASTQ format were trimmed to remove adapter and barcodes and aligned to  
the *Drosophila melanogaster* “hologenome” consisting of the reference sequence v5.40 plus common  
376 microbes<sup>47</sup> using the Burrows-Wheeler Aligner (BWA v0.7.12-r1039) with the *mem* option and default  
parameters<sup>70</sup>. PCR and optical duplicates were removed using Picard v1.112 and reads locally realigned  
378 around insertions/deletions using GATK v8.25. Alignment files in BAM format were merged for the  
different replicates using SAMtools and the resulting BAMs for the different pools of a given  
380 populations and temperature test were synchronised into MPILEUP using SAMtools and SYNC files  
using Popoolation2 v1.201. SNP and InDels were called using a custom script ensuring a Phred base  
382 quality score greater than q30, a minor allele frequency greater than 0.03, a base coverage greater than

the 25%-tile of the corresponding pool. Finally, only SNPs present in both temperature tests (treated as biological replicates) were called. The criteria of presence in both temperature tests ensured a robust identification of polymorphisms.

TE were called using PopoolationTE<sup>271</sup> with the *D. melanogaster* v5.40 genome masked for the TEs present in the reference sequence and using a publicly available TE hierarchy for *D. melanogaster* (<https://sourceforge.net/projects/popoolation-te2/files/walkthrough-refgenome.zip/download>). As for the SNPs and InDels, the presence of a TE in a population was validated if detected for the two temperature tests (biological replicates) within a window of 5kbp. Chromosomal inversion diagnostic SNPs were retrieved from the literature<sup>48</sup>, the corresponding positions were retrieved directly from the MPILEUP file without further cutoffs and the relevant alleles were tested for association, but excluded from the other polymorphism and population analysis. CNV were called based on read-depth using the CNVkit software v0.9.3<sup>72</sup>. Frequency of symbionts in each pool was detected from the merged BAM alignment file by comparing the average read depth over a given symbiont genome divided the average read depth of the *D. melanogaster* genome using SAMtools and custom scripts.

### Statistical analysis

Mixed-linear models were computed using the lme4 package of the R software. Nested models were compared using an ANOVA procedure and compared using deviance and Akaike information criteria (Table S2). The best model was:

$$\text{Time-to-death} = \mu + \beta_1 * \text{Temperature} + \beta_2 * \text{Insecticide} + \beta_3 * \text{Temperature} * \text{Insecticide} + z_1 * (\text{Temperature} + \text{Insecticide} \mid_{\text{population}}) + z_2 * (\text{Temperature} + \text{Insecticide} \mid_{\text{line}}) + \varepsilon,$$

where  $\mu$  is the intercept,  $\beta$ 's are the fixed effects of increasing the temperature from 20 to 30°C, the fixed effects of increasing the imidacloprid exposure from 0 to 1000ppm in the and the effect of their interaction,  $z$ 's are the random effects of increasing the temperature or the insecticide exposure among populations and among lines within population and  $\varepsilon$  the residual term.

408 Pool-based genome-wide association tests were performed with the GWAlpha package<sup>73</sup> using  
maximum likelihood estimation and significance was calculated using empirical p-values with a  
410 Benjamini and Hochenberg correction for multiple testing for a false discovery rate of FDR=5% on the  
loci whose coverage was within the interquartile range for a given pool. Candidate genes were  
412 identified based on the excessive 95% proportion of associated SNPs or InDels in the neighbouring  
5kbp window using the *D. melanogaster* genome annotation v5.57. Network and enrichment analysis  
414 were performed using the R spider pipeline<sup>74</sup> under the model D2 (one missing connection allowed)  
using 2047 gene name entries for *D. melanogaster* from the KEGG and Reactome databases (1<sup>st</sup> of  
416 December 2017). 225 gene identifiers out of 745 were recognised and 178 had a pathway information  
entry in the databases.

418 The Monte Carlo simulations used to test population genetic hypothesis were conducted by randomly  
shifting the circularised genomic position a 1000 times. The targeted summary statistic was then  
420 computed for the 1000 permutations to draw the expected null distribution and compare it to the  
observed statistic to derive the reported p-value.

422

### *Population genetics analysis*

424 For all population genetics analysis, each pool alignment file was down-sampled to even coverage for  
the 10 pool BAM alignment files for a given population (5 resistance pools x 2 temperatures) and  
426 merged into a single BAM file. Estimates for  $\pi$  and  $\theta$  were obtained from the down-sampled merged  
BAM files using the Npstats package<sup>75</sup> for windows of 5kbp only retaining polymorphism located in  
428 positions with quality phred > q30. Pairwise  $F_{st}$  between each population were estimated using the same  
setup as for  $\pi$  and  $\theta$  using the Popoolation2 package<sup>76</sup>. Mantel and Partial Mantel tests were performed  
430 using the R\vegan package using 1000 permutations for p-value calculation. Climate distance of 0  
corresponded to populations sharing both similar temperature and precipitation at their location of  
432 origin, 0.5 when sharing only temperature or precipitation or 1 otherwise. Ancestral and derived states

for each SNP and InDel polymorphism were determined by “shredding” the reference genomes for four  
434 closely related *Drosophila* species (*D. simulans*, *D. yakuba*, *D. erecta* and *D. sechellia*) using the  
Wgsim script (<https://github.com/lh3/wgsim>) generating 2.5M 500bp-long fragments for each species  
436 that were re-mapped onto the *D. melanogaster* v5.40 genome using BWA. Polymorphic sites were then  
called using the *call* function from the BCFtools package v1.3.1 (<https://samtools.github.io/bcftools>).  
438 For each SNP/InDel position, the ancestral state was assigned if three out of five (including *D.*  
*melanogaster* reference genome) states were identical or left undetermined otherwise. Selective sweeps  
440 were detected based on probability of selection in a Hidden Markov Model<sup>54</sup> implemented in the Pool-  
hmm package v1.4.3<sup>77</sup>. Allele frequency spectrum was computed for each chromosome using a random  
442 10% of the sites that had a coverage greater than 10X from the down-sampled merged BAM file for  
each population. We performed a sensitivity analysis to determine the transition probability *k* from  
444 neutral to selected state and determined that for  $k > 10e^{-4}$  the set selective sweeps detected remained  
consistent, so *k* was set to  $10e^{-4}$ .

446 All custom codes are deposited on GitHub ([https://github.com/aflevel/IMIresist\\_vs\\_TEMPtol](https://github.com/aflevel/IMIresist_vs_TEMPtol)) and the  
derived data are deposited on figshare (DOI:[10.26188/5b592f305226b](https://doi.org/10.26188/5b592f305226b)). Raw sequencing data  
448 generated in this study are available upon request.

#### 450 *Functional tests*

Fly stocks were ordered at the Bloomington *Drosophila* Stock Center and the crossing design used to  
452 obtain the tested lines are reported in Table S7. Deletions of *nAChRα3* were generated using two small  
guide (sg)RNAs flanking the targeted region designed using CRISPR Optimal Target Finder  
454 (<http://tools.flycrispr.molbio.wisc.edu/targetFinder/>), ActinCas9 gDNA was checked to ensure no SNPs  
existed and then the *nAChRα3* Del sgRNA 1 (GTCGCCGCAAACGCACACGA) and *nAChRα3* Del  
456 sgRNA2 (GCCCATCGATATAAAGCTAT) were ordered as oligonucleotides and each ligated  
separately into pU6-BbsI-gRNA plasmids as per the published protocol (<http://flycrispr.molbio.wisc>.

458 [edu/protocols/gRNA](#)). These were co-injected (each plasmid at 200ng/μl in water) into ActinCas9 flies  
following a standard microinjection protocol. Given the *nAChRα3* gene is located on chromosome X,  
460 injected adult male survivors were initially crossed back to AC9 and F1 males collected. A wing was  
clipped from males, DNA extracted and diagnostic PCR (Primers F  
462 5'GTGTGACTGTATTGGTGCTG3' and R 5'CACACACAGTCTGATGGAGC3') for deletion events  
performed. Flies with products smaller than the expected size (3590kb) were individually crossed to  
464 virgin female FM7 balancer flies and these were backcrossed to remove the FM7 balancer, producing  
the four independent homozygous deletion strains of *nAChRα3* used in this study (1.7, 5.3, 11.4 and  
466 15.1). Off-target analysis is reported in section 4.1 of the Supplementary Data.

## 468 References

- 470 1. Cressey, D. The bitter battle over the world's most popular insecticides. *Nature* **551**, 156–158  
(2017).
- 472 2. Cernansky, R. Controversial pesticides found in honey samples from six continents. *Nature*  
(2017). doi:10.1038/nature.2017.22762
- 474 3. Sureda Anfres, M. Controversial insecticides linked to wild bee declines. *Nature* (2016).  
doi:10.1038/nature.2016.20446
- 476 4. Rundlöf, M. *et al.* Seed coating with a neonicotinoid insecticide negatively affects wild bees.  
*Nature* **521**, 77–80 (2015).
- 478 5. Hallmann, C. A., Foppen, R. P. B., van Turnhout, C. A. M., de Kroon, H. & Jongejans, E.  
Declines in insectivorous birds are associated with high neonicotinoid concentrations. *Nature*  
480 **511**, 341–343 (2014).
6. Henry, M. *et al.* A Common Pesticide Decreases Foraging Success and Survival in Honey Bees.  
482 *Science* (80-. ). **336**, 348–350 (2012).
7. Schmidt, J. M. *et al.* Insights into DDT resistance from the drosophila melanogaster genetic  
484 reference panel. *Genetics* **207**, (2017).
8. Battlay, P., Schmidt, J. M., Fournier-Level, A. & Robin, C. Genomic and Transcriptomic  
486 Associations Identify a New Insecticide Resistance Phenotype for the Selective Sweep at the  
Cyp6g1 Locus of *Drosophila melanogaster*. *G3 Genes|Genomes|Genetics* g3.116.031054 (2016).

488 doi:10.1534/G3.116.031054

- 490 9. Miles, A. *et al.* Genetic diversity of the African malaria vector *Anopheles gambiae*. *Nature* **552**,  
96 (2017).
- 492 10. Lynd, A. *et al.* Field, Genetic, and Modeling Approaches Show Strong Positive Selection Acting  
upon an Insecticide Resistance Mutation in *Anopheles gambiae* s.s. *Mol. Biol. Evol.* **27**, 1117–  
1125 (2010).
- 494 11. Barnes, K. G. *et al.* Genomic Footprints of Selective Sweeps from Metabolic Resistance to  
496 Pyrethroids in African Malaria Vectors Are Driven by Scale up of Insecticide-Based Vector  
Control. *PLoS Genet.* **13**, e1006539 (2017).
- 498 12. Jones, C. M. *et al.* Footprints of positive selection associated with a mutation (N1575Y) in the  
voltage-gated sodium channel of *Anopheles gambiae*. doi:10.1073/pnas.1201475109
- 500 13. Zamoum, T. *et al.* Does insecticide resistance alone account for the low genetic variability of  
asexually reproducing populations of the peach-potato aphid *Myzus persicae*? *Heredity (Edinb)*.  
**94**, 630–639 (2005).
- 502 14. Anderson, C. J. *et al.* Hybridization and gene flow in the mega-pest lineage of moth,  
*Helicoverpa*. *Proc. Natl. Acad. Sci. U. S. A.* **115**, 5034–5039 (2018).
- 504 15. Woodcock, B. A. *et al.* Country-specific effects of neonicotinoid pesticides on honey bees and  
wild bees. *Science (80-. )*. **356**, 1393–1395 (2017).
- 506 16. Fournier-Level, A. *et al.* Behavioural response to combined insecticide and temperature stress in  
natural populations of *Drosophila melanogaster*. *J. Evol. Biol.* **29**, (2016).
- 508 17. Glunt, K. D., Oliver, S. V., Hunt, R. H. & Paaijmans, K. P. The impact of temperature on  
insecticide toxicity against the malaria vectors *Anopheles arabiensis* and *Anopheles funestus*.  
510 *Malar. J.* **17**, 131 (2018).
- 512 18. Daborn, P. J. *et al.* A single p450 allele associated with insecticide resistance in *Drosophila*.  
*Science* **297**, 2253–6 (2002).
- 514 19. Pittendrigh, B., Reenan, R., French-Constant, R. H. & Ganetzky, B. Point mutations in the  
*Drosophila* sodium channel gene para associated with resistance to DDT and pyrethroid  
insecticides. *Mol. Gen. Genet.* **256**, 602–10 (1997).
- 516 20. Fournier, D., Bride, J. M., Hoffmann, F. & Karch, F. Acetylcholinesterase. Two types of  
modifications confer resistance to insecticide. *J. Biol. Chem.* **267**, 14270–4 (1992).
- 518 21. Traverso, L. *et al.* Comparative and functional triatomine genomics reveals reductions and  
expansions in insecticide resistance-related gene families. *PLoS Negl. Trop. Dis.* **11**, e0005313  
520 (2017).
- 522 22. Faucon, F. *et al.* Identifying genomic changes associated with insecticide resistance in the  
dengue mosquito *Aedes aegypti* by deep targeted sequencing. *Genome Res.* **25**, 1347–1359



(2015).

- 524 23. Faucon, F. *et al.* In the hunt for genomic markers of metabolic resistance to pyrethroids in the  
526 mosquito *Aedes aegypti*: An integrated next-generation sequencing approach. *PLoS Negl. Trop.*  
*Dis.* **11**, e0005526 (2017).
24. Ffrench-Constant, R. H. The molecular genetics of insecticide resistance. *Genetics* **194**, 807–15  
528 (2013).
25. Messer, P. W. & Petrov, D. A. Population genomics of rapid adaptation by soft selective sweeps.  
530 *Trends Ecol. Evol.* **28**, 659–69 (2013).
26. Ventola, C. L. The Antibiotic Resistance Crisis: Part 1: Causes and Threats. *Pharm. Ther.* **40**,  
532 277–283 (2015).
27. Tabashnik, B. E. & Carrière, Y. Surge in insect resistance to transgenic crops and prospects for  
534 sustainability. *Nature Biotechnology* **35**, 926–935 (2017).
28. Mallet, J. The evolution of insecticide resistance: Have the insects won? *Trends in Ecology and*  
536 *Evolution* **4**, 336–340 (1989).
29. Munro, A. Economics and Biological Evolution 1. *Environ. Resour. Econ.* **9**, 429–449 (1997).
- 538 30. Schmidt, J. M. *et al.* Copy Number Variation and Transposable Elements Feature in Recent,  
Ongoing Adaptation at the *Cyp6g1* Locus. *PLoS Genet* **6**, e1000998 (2010).
- 540 31. Garud, N. R. *et al.* Recent Selective Sweeps in North American *Drosophila melanogaster* Show  
Signatures of Soft Sweeps. *PLOS Genet.* **11**, e1005004 (2015).
- 542 32. Schmidt, J. M. *et al.* Insights into DDT Resistance from the *Drosophila melanogaster* Genetic  
Reference Panel. *Genetics* **207**, 1181–1193 (2017).
- 544 33. Labbé, P. *et al.* Forty years of erratic insecticide resistance evolution in the mosquito *Culex*  
*pipiens*. *PLoS Genet.* **3**, e205 (2007).
- 546 34. Andersson, D. I. & Hughes, D. Antibiotic resistance and its cost: is it possible to reverse  
resistance? *Nat. Rev. Microbiol.* **8**, 260 (2010).
- 548 35. Kliot, A. & Ghanim, M. Fitness costs associated with insecticide resistance. *Pest Manag. Sci.* **68**,  
1431–7 (2012).
- 550 36. Vila-Aiub, M. M., Neve, P. & Powles, S. B. Fitness costs associated with evolved herbicide  
resistance alleles in plants. *New Phytol.* **184**, 751–767 (2009).
- 552 37. ffrench-Constant, R. H. & Bass, C. Does resistance really carry a fitness cost? *Current Opinion*  
*in Insect Science* **21**, 39–46 (2017).
- 554 38. Wu, C., Davis, A. S. & Tranel, P. J. Limited fitness costs of herbicide-resistance traits in  
*Amaranthus tuberculatus* facilitate resistance evolution. *Pest Manag. Sci.* **in press**, (2017).

- 556 39. Melnyk, A. H., Wong, A. & Kassen, R. The fitness costs of antibiotic resistance mutations. *Evol. Appl.* **8**, 273–283 (2015).
- 558 40. Bourguet, D., Guillemaud, T., Chevillon, C. & Raymond, M. Fitness costs of insecticide resistance in natural breeding sites of the mosquito *Culex pipiens*. *Evolution* **58**, 128–35 (2004).
- 560 41. Cousens, R. D. & Fournier-Level, A. Herbicide resistance costs: what are we actually measuring and why? *Pest Manag. Sci.* (2017). doi:10.1002/ps.4819
- 562 42. Nkya, T. E. *et al.* Insecticide resistance mechanisms associated with different environments in the malaria vector *Anopheles gambiae*: a case study in Tanzania. *Malar. J.* **13**, 28 (2014).
- 564 43. Sternberg, E. D. & Thomas, M. B. Local adaptation to temperature and the implications for vector-borne diseases. *Trends Parasitol.* **30**, 115–122 (2014).
- 566 44. Lack, J. B., Lange, J. D., Tang, A. D., Corbett-Detig, R. B. & Pool, J. E. A Thousand Fly Genomes: An Expanded *Drosophila* Genome Nexus. *Mol. Biol. Evol.* **33**, 3308–3313 (2016).
- 568 45. Hoffmann, A. A., Anderson, A. & Hallas, R. Opposing clines for high and low temperature resistance in *Drosophila melanogaster*. *Ecol. Lett.* **5**, 614–618 (2002).
- 570 46. Turner, T. L., Levine, M. T., Eckert, M. L. & Begun, D. J. Genomic analysis of adaptive differentiation in *Drosophila melanogaster*. *Genetics* **179**, 455–73 (2008).
- 572 47. Kapun, M., Fabian, D. K., Goudet, J. & Flatt, T. Genomic Evidence for Adaptive Inversion Clines in *Drosophila melanogaster*. *Mol. Biol. Evol.* **33**, 1317–1336 (2016).
- 574 48. Kapun, M., Van Schalkwyk, H., McAllister, B., Flatt, T. & Schlötterer, C. Inference of chromosomal inversion dynamics from Pool-Seq data in natural and laboratory populations of *Drosophila melanogaster*. *Mol. Ecol.* **23**, 1813–1827 (2014).
- 576 49. Rane, R. V., Rako, L., Kapun, M., Lee, S. F. & Hoffmann, A. A. Genomic evidence for role of inversion 3RP of *Drosophila melanogaster* in facilitating climate change adaptation. *Mol. Ecol.* **24**, 2423–2432 (2015).
- 578 50. Matsuda, K. *et al.* Neonicotinoids: insecticides acting on insect nicotinic acetylcholine receptors. *Trends Pharmacol. Sci.* **22**, 573–580 (2001).
- 580 51. Venken, K. J. T. *et al.* MiMIC: a highly versatile transposon insertion resource for engineering *Drosophila melanogaster* genes. *Nat. Methods* **8**, 737–43 (2011).
- 582 52. Lavington, E. & Kern, A. D. The Effect of Common Inversion Polymorphisms In(2L)t and In(3R)Mo on Patterns of Transcriptional Variation in *Drosophila melanogaster*. *G3 (Bethesda)*. **7**, 3659–3668 (2017).
- 584 53. Vörösmarty, C. J. *et al.* Global threats to human water security and river biodiversity. *Nature* **467**, 555–561 (2010).
- 586 54. Boitard, S., Schlotterer, C., Nolte, V., Pandey, R. V. & Futschik, A. Detecting Selective Sweeps

- 590 from Pooled Next-Generation Sequencing Samples. *Mol. Biol. Evol.* **29**, 2177–2186 (2012).
55. Buckingham, S. D., Lapied, B., Le Corronc, H., Grolleau, F. & Sattelle, D. B. Imidacloprid  
592 actions on insect neuronal acetylcholine receptors. *J. Exp. Biol.* **200**, 2685–2692 (1997).
56. Cervera, M., Arredondo, J. J. & Ferreres, R. M. in *Nature's Versatile Engine: Insect Flight  
594 Muscle Inside and Out* 76–85 (Springer US, 2006). doi:10.1007/0-387-31213-7\_6
57. Liu, H. *et al.* Paramyosin phosphorylation site disruption affects indirect flight muscle stiffness  
596 and power generation in *Drosophila melanogaster*. *Proc. Natl. Acad. Sci. U. S. A.* **102**, 10522–7  
(2005).
58. Merzendorfer, H. *et al.* Genomic and proteomic studies on the effects of the insect growth  
598 regulator diflubenzuron in the model beetle species *Tribolium castaneum*. *Insect Biochem. Mol.  
600 Biol.* **42**, 264–276 (2012).
59. Zhao, L., Alto, B., Shin, D. & Yu, F. The Effect of Permethrin Resistance on *Aedes aegypti*  
602 Transcriptome Following Ingestion of Zika Virus Infected Blood. *Viruses* **10**, 470 (2018).
60. Gonzalez-Freire, M., de Cabo, R., Studenski, S. A. & Ferrucci, L. The Neuromuscular Junction:  
604 Aging at the Crossroad between Nerves and Muscle. *Front. Aging Neurosci.* **6**, 208 (2014).
61. Takamori, M. Synaptic Homeostasis and Its Immunological Disturbance in Neuromuscular  
606 Junction Disorders. *Int. J. Mol. Sci.* **18**, (2017).
62. Jousen, N., Heckel, D. G., Haas, M., Schuphan, I. & Schmidt, B. Metabolism of imidacloprid  
608 and DDT by P450 CYP6G1 expressed in cell cultures of *Nicotiana tabacum* suggests  
detoxification of these insecticides in Cyp6g1-overexpressing strains of *Drosophila  
610 melanogaster*, leading to resistance. *Pest Manag. Sci.* **64**, 65–73 (2008).
63. Fusetto, R., Denecke, S., Perry, T., O'Hair, R. A. J. & Batterham, P. Partitioning the roles of  
612 CYP6G1 and gut microbes in the metabolism of the insecticide imidacloprid in *Drosophila  
melanogaster*. *Sci. Rep.* **7**, 11339 (2017).
64. Denecke, S. *et al.* Multiple P450s and Variation in Neuronal Genes Underpins the Response to  
614 the Insecticide Imidacloprid in a Population of *Drosophila melanogaster*. *Sci. Rep.* **7**, (2017).
65. Broderick, N. A., Raffa, K. F. & Handelsman, J. Midgut bacteria required for *Bacillus*  
616 *thuringiensis* insecticidal activity. *Proc. Natl. Acad. Sci. U. S. A.* **103**, 15196–9 (2006).
66. Cheng, D. *et al.* Gut symbiont enhances insecticide resistance in a significant pest, the oriental  
618 fruit fly *Bactrocera dorsalis* (Hendel). *Microbiome* **5**, 13 (2017).
67. Dada, N., Sheth, M., Liebman, K., Pinto, J. & Lenhart, A. Whole metagenome sequencing  
620 reveals links between mosquito microbiota and insecticide resistance in malaria vectors. *Sci.  
622 Rep.* **8**, 2084 (2018).
68. Kikuchi, Y. *et al.* Symbiont-mediated insecticide resistance. *Proc. Natl. Acad. Sci. U. S. A.* **109**,  
624 8618–22 (2012).

69. Hoffmann, A. A. Rapid adaptation of invertebrate pests to climatic stress? *Curr. Opin. Insect Sci.* **21**, 7–13 (2017).  
626
70. Li, H. Aligning sequence reads, clone sequences and assembly contigs with BWA-MEM. (2013).  
628 at <<http://arxiv.org/abs/1303.3997>>
71. Kofler, R., Gómez-Sánchez, D. & Schlötterer, C. PoPoolationTE2: Comparative Population  
630 Genomics of Transposable Elements Using Pool-Seq. *Mol. Biol. Evol.* **33**, 2759–2764 (2016).
72. Talevich, E., Shain, A. H., Botton, T. & Bastian, B. C. CNVkit: Genome-Wide Copy Number  
632 Detection and Visualization from Targeted DNA Sequencing. *PLOS Comput. Biol.* **12**, e1004873  
(2016).
73. Fournier-Level, A., Robin, C. & Balding, D. J. GWAlpha: genome-wide estimation of additive  
634 effects (alpha) based on trait quantile distribution from pool-sequencing experiments.  
*Bioinformatics* **btw805**, btw805 (2016).  
636
74. Antonov, A. V., Schmidt, E. E., Dietmann, S., Krestyaninova, M. & Hermjakob, H. R spider: A  
638 network-based analysis of gene lists by combining signaling and metabolic pathways from  
Reactome and KEGG databases. *Nucleic Acids Res.* **38**, W78–W83 (2010).
75. Ferretti, L., Ramos-Onsins, S. E. & Pérez-Enciso, M. Population genomics from pool  
640 sequencing. *Mol. Ecol.* **22**, 5561–5576 (2013).
76. Kofler, R., Pandey, R. V. & Schlötterer, C. PoPoolation2: identifying differentiation between  
642 populations using sequencing of pooled DNA samples (Pool-Seq). *Bioinformatics* **27**, 3435–6  
644 (2011).
77. Boitard, S. *et al.* Pool-hmm: a Python program for estimating the allele frequency spectrum and  
646 detecting selective sweeps from next generation sequencing of pooled samples. *Mol. Ecol. Resour.* **13**,  
337–40 (2013).  
648

## Acknowledgements

650 Thanks to David Begun, Sean Myles and Craig Hart for sharing their laboratory facilities; Philippa  
Griffin for fly collection, Kristy Charles at Foursights Wines, David Herbert at Herbert Vineyard, Peter  
652 Dixon at Henty Estate, Jonathan Leahy at Becker’s Vineyard, John Seago at Ponchartrain Vineyard  
and Landry Vineyards for providing access to their estate. This work was supported by the Human  
654 Frontier in Sciences Long Term fellowship #LT000907/2012-L awarded to AFL.

## Author contributions

656

AFL and CR designed the study and wrote the manuscript with contribution from TP and AAH; AFL,  
658 RTG and SW performed the experiments; AFL analysed the data with contribution from AAH, RVR  
and Paul Battlay; AAH, Paul Battlay and TP revised the manuscript; AAH, MS, Phil Batterham, TP and  
660 WC provided new genetic material.

662 **Competing interests**

The authors declare no conflicting or competing interests.

664
